# Supplementary material for: Epigenetic Alterations and Canonical Pathway Disruption in Papillary Thyroid Cancer: A Genome-wide Methylation Analysis
Source: Springer Nature journal article supplement (doi:10.1245/s10434-016-5185-4), 2016-03-15
Supplement: MOESM3 [file 9804672]

| Appendix C: Differentially Methylated Diseases and Biofunctions | | |  |
| --- | --- | --- | --- |
| Whole Genome Methylation Signature | | | |
| Disease or Biofunction | Activation z-score | p-value | Number of Molecules |
| malignant solid tumor | 1.107 | 2.95E-33 | 582 |
| Cancer | -0.498 | 1.24E-29 | 590 |
| neoplasia of epithelial tissue | 0.46 | 1.06E-27 | 517 |
| epithelial cancer | 0.982 | 1.54E-27 | 510 |
| abdominal neoplasm | 0.97 | 3.21E-26 | 507 |
| melanoma | 0.447 | 9.48E-26 | 419 |
| abdominal cancer | 0.826 | 1.11E-24 | 500 |
| digestive organ tumor | 0.68 | 3.32E-23 | 448 |
| digestive system cancer | 0.03 | 1.52E-22 | 444 |
| skin tumor | -0.092 | 6.95E-20 | 296 |
| adenocarcinoma | 2.173 | 9.69E-20 | 391 |
| skin cancer | 0 | 4.35E-18 | 288 |
| gastrointestinal neoplasia | 0.529 | 1.64E-17 | 321 |
| gastrointestinal tract cancer | -0.196 | 5.45E-17 | 317 |
| cell movement | -4.483 | 1.02E-16 | 169 |
| abdominal adenocarcinoma | 0 | 3.41E-16 | 353 |
| gastrointestinal adenocarcinoma | 0 | 6.62E-16 | 278 |
| breast or colorectal cancer | -2.138 | 2.28E-15 | 308 |
| gastrointestinal carcinoma | -0.152 | 2.29E-15 | 287 |
| Lymphoid Cancer and Tumors | 1.535 | 2.41E-15 | 136 |
| quantity of cells | -1.69 | 4.07E-15 | 144 |
| migration of cells | -4.715 | 9.65E-15 | 151 |
| cell death | 1.524 | 1.07E-14 | 233 |
| malignant cutaneous melanoma cancer | 0 | 1.21E-14 | 270 |
| lymphoid cancer | 1.669 | 2.86E-14 | 131 |
| hematological neoplasia | 1.129 | 4.35E-14 | 141 |
| apoptosis | 2.795 | 4.36E-14 | 193 |
| lymphohematopoietic cancer | 1.578 | 4.63E-14 | 141 |
| hematologic cancer | 1.427 | 1.95E-13 | 138 |
| hepatobiliary system cancer | 1.132 | 2.65E-13 | 271 |
| urogenital cancer | 0.933 | 4.01E-13 | 274 |
| liver tumor | 0.956 | 6.17E-13 | 270 |
| liver cancer | 1.709 | 8.27E-13 | 268 |
| organismal death | 8.358 | 1.54E-12 | 170 |
| necrosis | 1.352 | 2.4E-12 | 184 |
| upper gastrointestinal tract tumor | -0.57 | 2.75E-12 | 134 |
| development of cardiovascular system | -2.473 | 3.12E-12 | 97 |
| gastroesophageal adenocarcinoma | 0 | 5.2E-12 | 108 |
| differentiation of cells | -0.754 | 9.59E-12 | 160 |
| lymphocytic cancer | 3.085 | 9.63E-12 | 61 |
| proliferation of cells | -1.679 | 1.03E-11 | 237 |
| colon tumor | 0 | 1.18E-11 | 236 |
| genital tumor | 1.539 | 1.4E-11 | 248 |
| intestinal tumor | 0.563 | 1.61E-11 | 261 |
| upper gastrointestinal tract cancer | -0.651 | 1.67E-11 | 128 |
| morphology of cells | 0 | 1.76E-11 | 142 |
| colorectal neoplasia | -0.068 | 1.84E-11 | 260 |
| intestinal cancer | 0.447 | 2.12E-11 | 259 |
| gastric adenocarcinoma | 0 | 2.37E-11 | 93 |
| neoplasia of colon | 0 | 2.75E-11 | 234 |
| colorectal cancer | -1 | 3.03E-11 | 258 |
| colon cancer | 0 | 3.52E-11 | 233 |
| genital tract cancer | 0 | 3.85E-11 | 238 |
| invasion of cells | -3.147 | 4.81E-11 | 76 |
| gastro-esophageal carcinoma | 0 | 7.2E-11 | 109 |
| angiogenesis | -2.235 | 8.28E-11 | 80 |
| gastroesophageal cancer | 0 | 8.71E-11 | 117 |
| formation of actin stress fibers | -0.381 | 9.85E-11 | 32 |
| formation of actin filaments | -1.195 | 1.36E-10 | 37 |
| colorectal carcinoma | 0 | 1.44E-10 | 229 |
| neoplasia of stomach | 1.067 | 1.64E-10 | 102 |
| gastric cancer | 0 | 1.68E-10 | 101 |
| quantity of synapse | -1.414 | 1.76E-10 | 16 |
| lymphatic node tumor | 2.401 | 1.8E-10 | 52 |
| colon adenocarcinoma | 0 | 1.93E-10 | 216 |
| proliferation of tumor cell lines | -2.012 | 1.95E-10 | 115 |
| organization of cytoskeleton | -2.601 | 2.22E-10 | 107 |
| colon carcinoma | 0 | 2.26E-10 | 219 |
| colorectal adenocarcinoma | 0 | 2.29E-10 | 224 |
| head and neck neoplasia | 0.941 | 3.65E-10 | 148 |
| head and neck cancer | 0.392 | 6.39E-10 | 59 |
| breast or ovarian cancer | -1.387 | 6.48E-10 | 131 |
| mammary tumor | -1.154 | 9.15E-10 | 116 |
| organization of cytoplasm | -2.601 | 1.07E-09 | 112 |
| non-Hodgkin's disease | 1.988 | 1.24E-09 | 49 |
| organization of actin cytoskeleton | -0.167 | 1.33E-09 | 35 |
| breast cancer | -1.982 | 1.34E-09 | 109 |
| cell viability | -6.71 | 1.62E-09 | 100 |
| cell survival | -6.919 | 2.16E-09 | 106 |
| central nervous system tumor | -1.029 | 2.16E-09 | 72 |
| vasculogenesis | -2.11 | 2.26E-09 | 66 |
| fibrogenesis | -1.272 | 2.36E-09 | 43 |
| pelvic cancer | 0 | 2.85E-09 | 233 |
| formation of cytoskeleton | -1.282 | 3.5E-09 | 40 |
| cancer of secretory structure | 0 | 3.5E-09 | 133 |
| differentiation of blood cells | -1.195 | 4.7E-09 | 71 |
| differentiation of leukocytes | -1.597 | 5.35E-09 | 60 |
| morphology of body cavity | 0 | 6.89E-09 | 90 |
| cell death of tumor cell lines | 1.875 | 7.07E-09 | 112 |
| apoptosis of tumor cell lines | 1.583 | 7.44E-09 | 93 |
| cell movement of tumor cell lines | -3.697 | 1.13E-08 | 68 |
| transcription | -1.929 | 2.05E-08 | 131 |
| phosphorylation of protein | -1.889 | 2.15E-08 | 61 |
| quantity of leukocytes | -0.604 | 2.31E-08 | 73 |
| differentiation of connective tissue | 0.304 | 2.49E-08 | 62 |
| differentiation of mononuclear leukocytes | -1.158 | 2.68E-08 | 50 |
| quantity of lymphocytes | -0.884 | 3.78E-08 | 59 |
| migration of tumor cell lines | -3.902 | 4.21E-08 | 57 |
| female genital neoplasm | 0.728 | 4.55E-08 | 208 |
| bone marrow neoplasm | -2.36 | 5.22E-08 | 92 |
| development of body trunk | -1.733 | 6.98E-08 | 79 |
| quantity of mononuclear leukocytes | -0.819 | 7.05E-08 | 60 |
| formation of filaments | -1.307 | 7.18E-08 | 39 |
| thyroid cancer | 0 | 7.27E-08 | 25 |
| differentiation of lymphocytes | -1.391 | 7.72E-08 | 46 |
| neuroepithelial tumor | -0.066 | 7.74E-08 | 61 |
| development of cytoplasm | -1.556 | 9.42E-08 | 43 |
| transcription of RNA | -1.382 | 9.45E-08 | 122 |
| cecum adenocarcinoma | 0 | 9.97E-08 | 90 |
| expression of RNA | -1.916 | 1.19E-07 | 136 |
| gliomatosis | -0.287 | 1.24E-07 | 60 |
| neuronal cell death | -0.246 | 1.33E-07 | 60 |
| formation of focal adhesions | -0.744 | 1.48E-07 | 20 |
| microtubule dynamics | -2.407 | 1.6E-07 | 86 |
| quantity of neurons | -1.922 | 1.62E-07 | 40 |
| Wound | -0.931 | 1.76E-07 | 26 |
| female genital tract cancer | 0 | 1.86E-07 | 197 |
| invasion of tumor cell lines | -2.402 | 1.9E-07 | 53 |
| abnormal morphology of body cavity | 0 | 2.11E-07 | 82 |
| inflammatory response | -2.076 | 2.4E-07 | 64 |
| apoptosis of fibroblast cell lines | -1.515 | 2.49E-07 | 33 |
| brain tumor | 0 | 2.54E-07 | 51 |
| formation of cellular protrusions | -2.437 | 3.04E-07 | 68 |
| quantity of T lymphocytes | 0.196 | 3.31E-07 | 46 |
| bone marrow cancer | -2.44 | 3.57E-07 | 87 |
| chemotaxis of cells | -3.646 | 3.69E-07 | 47 |
| growth of epithelial tissue | -0.897 | 3.86E-07 | 57 |
| homing of cells | -3.722 | 4.11E-07 | 49 |
| chemotaxis | -3.856 | 4.22E-07 | 48 |
| endometrial cancer | 0 | 4.28E-07 | 171 |
| homing | -3.903 | 4.3E-07 | 50 |
| reorganization of cytoskeleton | -1.326 | 4.32E-07 | 23 |
| quantity of lymphatic system component | 0.268 | 4.85E-07 | 35 |
| quantity of blood cells | -0.939 | 4.95E-07 | 76 |
| size of cells | 0 | 7.98E-07 | 39 |
| incidence of lung tumor | 2.918 | 8.17E-07 | 12 |
| leukocyte migration | -3.466 | 9.25E-07 | 69 |
| Fibrosis | -0.057 | 9.54E-07 | 45 |
| female genital tract adenocarcinoma | 0 | 9.58E-07 | 169 |
| leukemia | -2.217 | 9.96E-07 | 87 |
| lung tumor | 1.784 | 1.26E-06 | 74 |
| organization of actin filaments | 0.6 | 1.32E-06 | 15 |
| morphology of head | 0 | 1.35E-06 | 62 |
| respiratory system tumor | 1.53 | 1.42E-06 | 76 |
| incidence of adenocarcinoma | 3.422 | 1.53E-06 | 12 |
| differentiation of tumor cell lines | -0.457 | 1.56E-06 | 35 |
| cell movement of fibroblasts | -0.827 | 1.59E-06 | 21 |
| cell death of colon cancer cell lines | -0.26 | 1.61E-06 | 28 |
| differentiation of connective tissue cells | 0.584 | 1.68E-06 | 52 |
| abnormal morphology of cells | 0 | 1.73E-06 | 86 |
| abnormal morphology of head | 0 | 1.86E-06 | 59 |
| malignant neoplasm of endocrine gland | 0 | 2.02E-06 | 28 |
| abnormal morphology of nervous system | 0 | 2.26E-06 | 55 |
| neck neoplasm | 0 | 2.32E-06 | 92 |
| cell movement of leukocytes | -2.665 | 2.34E-06 | 61 |
| healing of lesion | 0 | 2.49E-06 | 21 |
| morphology of nervous system | 0 | 2.51E-06 | 59 |
| advanced malignant tumor | -0.97 | 2.56E-06 | 63 |
| development of connective tissue | -1.648 | 2.63E-06 | 34 |
| cell death of connective tissue cells | -1.022 | 2.64E-06 | 50 |
| breast or ovarian carcinoma | 0 | 2.67E-06 | 82 |
| urinary tract cancer | 0.655 | 2.7E-06 | 117 |
| thyroid gland tumor | 0 | 2.75E-06 | 91 |
| central nervous system cancer | -1.969 | 2.79E-06 | 33 |
| cell-mediated response | -1.634 | 3.09E-06 | 21 |
| uterine tumor | 0 | 3.2E-06 | 181 |
| differentiation of lymphoma cell lines | -1.32 | 3.21E-06 | 9 |
| proliferation of carcinoma cell lines | -2.289 | 3.52E-06 | 30 |
| healing of wound | 0 | 3.54E-06 | 20 |
| lymphoproliferative disorder | 1.832 | 3.64E-06 | 58 |
| activation of DNA endogenous promoter | -1.331 | 3.85E-06 | 80 |
| urinary tract tumor | 0.862 | 3.89E-06 | 118 |
| transcription of DNA | -0.966 | 3.89E-06 | 97 |
| uterine cancer | 0 | 4.09E-06 | 173 |
| development of neurons | -2.696 | 4.3E-06 | 57 |
| Lung Cancer and Tumors | 1.247 | 4.5E-06 | 69 |
| serous neoplasm | 0 | 4.73E-06 | 44 |
| malignant neoplasm of thorax | 1.681 | 4.76E-06 | 70 |
| congenital anomaly of musculoskeletal system | 3.141 | 4.89E-06 | 52 |
| male genital neoplasm | 1.596 | 4.9E-06 | 71 |
| cell movement of connective tissue cells | -1.427 | 4.95E-06 | 23 |
| myeloproliferative disorder | -1.72 | 5.02E-06 | 65 |
| B-cell lymphoproliferative disorder | 1.948 | 5.07E-06 | 49 |
| abnormal morphology of thoracic cavity | 0 | 5.11E-06 | 46 |
| proliferation of lung cancer cell lines | -2.134 | 5.14E-06 | 26 |
| incidence of carcinoma | 3.51 | 5.31E-06 | 16 |
| apoptosis of neurons | 2.548 | 5.53E-06 | 38 |
| endocrine gland tumor | 2.365 | 5.67E-06 | 100 |
| incidence of tumor | 3.962 | 5.72E-06 | 29 |
| morphology of cardiovascular system | 0 | 5.75E-06 | 51 |
| Lymphocyte homeostasis | -1.651 | 6.27E-06 | 44 |
| proliferation of brain cancer cell lines | -1.39 | 6.33E-06 | 20 |
| lung cancer | 1.142 | 6.53E-06 | 68 |
| epithelial thyroid cancer | 0 | 6.78E-06 | 19 |
| malignant neoplasm of male genital organ | 0 | 7.22E-06 | 68 |
| phagocytosis | -1.955 | 7.32E-06 | 29 |
| prostate cancer | 0 | 8.22E-06 | 65 |
| incidence of malignant tumor | 3.897 | 8.37E-06 | 20 |
| development of blood cells | -2.164 | 8.94E-06 | 50 |
| proliferation of blood cells | -0.069 | 9.03E-06 | 62 |
| glucose metabolism disorder | 2.554 | 1.01E-05 | 85 |
| cell viability of tumor cell lines | -4.444 | 1.04E-05 | 56 |
| B-cell neoplasm | 2.357 | 1.11E-05 | 30 |
| carcinoma in breast | 0 | 1.13E-05 | 61 |
| inflammation of organ | 2.602 | 1.25E-05 | 78 |
| Prostate Cancer and Tumors | 0.911 | 1.27E-05 | 66 |
| Schizophrenia | 0 | 1.4E-05 | 41 |
| cell death of fibroblast cell lines | -1.693 | 1.47E-05 | 36 |
| homing of leukocytes | -2.739 | 1.49E-05 | 33 |
| cell movement of brain cancer cell lines | -1.434 | 1.75E-05 | 15 |
| proliferation of fibroblast-like synoviocytes | -1.698 | 1.84E-05 | 6 |
| proliferation of hepatoma cell lines | 1.37 | 1.85E-05 | 20 |
| endometrial carcinoma | 0 | 1.92E-05 | 153 |
| interstitial fibrosis | 0.679 | 2.02E-05 | 12 |
| interstitial fibrosis of kidney | 1.431 | 2.03E-05 | 9 |
| quantity of tumor cell lines | 0.231 | 2.07E-05 | 16 |
| development of lymphocytes | -1.681 | 2.08E-05 | 43 |
| necrosis of kidney | 0.774 | 2.08E-05 | 32 |
| female genital tract serous cancer | 0 | 2.09E-05 | 28 |
| formation of skin | 0.14 | 2.09E-05 | 31 |
| cell viability of neurons | -3.079 | 2.13E-05 | 24 |
| morbidity or mortality | -0.182 | 2.15E-05 | 23 |
| cell death of kidney cells | 0.642 | 2.18E-05 | 31 |
| morphology of actin cytoskeleton | 0 | 2.25E-05 | 7 |
| invasion of tumor | -2.21 | 2.27E-05 | 23 |
| cell death of breast cancer cell lines | 1.055 | 2.34E-05 | 29 |
| invasion of tissue | -1.612 | 2.38E-05 | 20 |
| G0/G1 phase transition | 0 | 2.43E-05 | 11 |
| conversion of leukocytes | -0.788 | 2.52E-05 | 6 |
| cytostasis of tumor cell lines | -0.475 | 2.67E-05 | 17 |
| cell movement of phagocytes | -2.66 | 2.67E-05 | 44 |
| antibody-dependent cell-mediated cytotoxicity | -0.461 | 2.79E-05 | 9 |
| vascular disease | -1.372 | 2.81E-05 | 68 |
| development of connective tissue cells | -0.906 | 2.82E-05 | 22 |
| progression of tumor | -0.698 | 2.87E-05 | 17 |
| hypertrophy of cells | 1.159 | 3.1E-05 | 26 |
| reorganization of actin cytoskeleton | -0.102 | 3.15E-05 | 15 |
| myeloid leukemia | 0 | 3.64E-05 | 59 |
| brain cancer | 0 | 3.67E-05 | 18 |
| T cell homeostasis | -1.379 | 3.68E-05 | 40 |
| cell movement of dermal fibroblasts | -0.447 | 3.69E-05 | 5 |
| turnover of focal adhesions | -1 | 3.69E-05 | 5 |
| invasion of breast cancer cell lines | -1.089 | 3.71E-05 | 22 |
| cell death of kidney cell lines | 0.458 | 4.01E-05 | 27 |
| T-cell non-Hodgkin's disease | 0 | 4.18E-05 | 19 |
| astrocytoma | 0 | 4.23E-05 | 44 |
| diabetes mellitus | 1.593 | 4.36E-05 | 70 |
| T cell development | -1.383 | 4.45E-05 | 39 |
| abnormal morphology of epithelial tissue | 0 | 4.46E-05 | 33 |
| development of leukocytes | -1.852 | 4.63E-05 | 44 |
| adenocarcinoma in endometrium | 0 | 4.64E-05 | 149 |
| tumorigenesis of benign tumor | -0.93 | 4.65E-05 | 12 |
| quantity of lymphoid organ | 0.118 | 4.7E-05 | 26 |
| formation of cells | -2.232 | 4.91E-05 | 66 |
| papillary carcinoma | 0 | 4.97E-05 | 23 |
| cell movement of antigen presenting cells | -2.581 | 4.98E-05 | 30 |
| formation of muscle cells | -1.599 | 5.07E-05 | 18 |
| systemic lupus erythematosus | 0 | 5.1E-05 | 16 |
| phosphorylation of L-amino acid | -2.376 | 5.15E-05 | 20 |
| apoptosis of breast cancer cell lines | 0.532 | 5.48E-05 | 25 |
| growth of tumor | -3.003 | 5.5E-05 | 54 |
| uterine carcinoma | 0 | 5.56E-05 | 155 |
| endometrioid carcinoma | 0 | 5.69E-05 | 149 |
| differentiation of T lymphocytes | -1.35 | 5.71E-05 | 31 |
| B-cell non-Hodgkin's disease | 1.948 | 5.72E-05 | 28 |
| activation of cells | -2.589 | 5.73E-05 | 69 |
| chronic leukemia | 0 | 5.75E-05 | 34 |
| cutaneous lymphoma | 0 | 5.77E-05 | 9 |
| immune response of cells | -1.518 | 5.86E-05 | 44 |
| chemotaxis of leukocytes | -2.594 | 6.07E-05 | 30 |
| uterine serous papillary cancer | 0 | 6.08E-05 | 21 |
| abnormal morphology of abdomen | 0 | 6.19E-05 | 58 |
| Hypertrophy | -0.084 | 6.29E-05 | 37 |
| phagocytosis of cells | -2.364 | 6.29E-05 | 25 |
| proliferation of immune cells | -0.177 | 6.47E-05 | 56 |
| autoimmune thyroid disease | 0 | 6.52E-05 | 7 |
| proliferation of splenocytes | -0.276 | 6.64E-05 | 11 |
| adhesion of fibroblasts | -0.378 | 6.66E-05 | 8 |
| solid tumor of head and neck | 0 | 6.67E-05 | 41 |
| apoptosis of leukocytes | 0.619 | 6.72E-05 | 37 |
| branching of cells | -0.941 | 6.82E-05 | 30 |
| weight loss | 1.962 | 6.95E-05 | 22 |
| endocytosis | -2.215 | 7.23E-05 | 29 |
| proliferation of myeloid cells | 0.01 | 7.81E-05 | 13 |
| development of digestive system | -1.446 | 7.95E-05 | 30 |
| cell movement of macrophages | -2.113 | 8.04E-05 | 24 |
| abnormal bone density | 1.004 | 8.28E-05 | 18 |
| papillary adenocarcinoma | 0 | 8.28E-05 | 18 |
| morphology of urinary system | 0 | 8.51E-05 | 23 |
| proliferation of fibroblast cell lines | 0.878 | 8.56E-05 | 33 |
| formation of lung | 0 | 8.61E-05 | 25 |
| development of breast cell lines | 0 | 8.7E-05 | 4 |
| interphase of skin cell lines | 0 | 8.7E-05 | 4 |
| cardiogenesis | 0 | 8.8E-05 | 29 |
| Hypertension | -0.881 | 9.01E-05 | 46 |
| abnormal morphology of urinary system | 0 | 9.37E-05 | 22 |
| necrosis of epithelial tissue | -1.251 | 9.52E-05 | 45 |
| upper aerodigestive tract carcinoma | 0 | 9.84E-05 | 41 |
| neuritogenesis | -2.73 | 9.95E-05 | 42 |
| metastasis | -0.97 | 1.02E-04 | 53 |
| proliferation of epithelial cells | -1.033 | 1.02E-04 | 38 |
| formation of Ab-secreting B cells | 0 | 1.03E-04 | 3 |
| radiosensitivity of carcinoma cell lines | 0 | 1.03E-04 | 3 |
| engulfment of cells | -2.887 | 1.05E-04 | 33 |
| proteinosis | 0 | 1.06E-04 | 5 |
| aggregation of cells | -2.199 | 1.07E-04 | 29 |
| non-insulin-dependent diabetes mellitus | 0 | 1.07E-04 | 30 |
| cell transformation | -2.619 | 1.12E-04 | 35 |
| apoptosis of colon cancer cell lines | -0.048 | 1.13E-04 | 21 |
| cell cycle progression of cancer cells | 0 | 1.18E-04 | 6 |
| formation of muscle | -1.732 | 1.24E-04 | 31 |
| organization of filaments | 0.6 | 1.25E-04 | 19 |
| arrest in G0/G1 phase transition | 0 | 1.25E-04 | 9 |
| differentiation of bone cells | 0.439 | 1.27E-04 | 32 |
| recruitment of mononuclear leukocytes | -2.742 | 1.27E-04 | 13 |
| morphology of heart | 0 | 1.28E-04 | 31 |
| cell movement of endothelial cells | -2.35 | 1.29E-04 | 29 |
| respiratory system development | 0 | 1.35E-04 | 27 |
| apoptosis of kidney cell lines | 0.893 | 1.38E-04 | 21 |
| delay in apoptosis | 0 | 1.4E-04 | 8 |
| apoptosis of blood cells | 0.795 | 1.42E-04 | 38 |
| sezary syndrome | 0 | 1.43E-04 | 10 |
| brain glioma | 0 | 1.45E-04 | 35 |
| proliferation of lymphocytes | 0.283 | 1.45E-04 | 51 |
| neoplasia of cells | -0.795 | 1.46E-04 | 32 |
| cell movement of breast cancer cell lines | -2.33 | 1.48E-04 | 23 |
| proliferation of hematopoietic progenitor cells | 0.455 | 1.52E-04 | 21 |
| morphology of lymphoid organ | 0 | 1.55E-04 | 30 |
| ossification of bone | 0 | 1.57E-04 | 15 |
| cell polarity formation | 0 | 1.59E-04 | 9 |
| quantity of memory T lymphocytes | 0.714 | 1.59E-04 | 9 |
| scattering | -0.73 | 1.6E-04 | 11 |
| abnormal morphology of lymphoid organ | 0 | 1.73E-04 | 29 |
| mineralization of cells | -0.129 | 1.75E-04 | 10 |
| morphology of spleen | 0 | 1.77E-04 | 23 |
| branching of exocrine gland | -2.611 | 1.78E-04 | 9 |
| Bleeding | 4.343 | 1.79E-04 | 32 |
| abnormal morphology of cardiovascular system | 0 | 1.79E-04 | 43 |
| morphology of kidney | 0 | 1.84E-04 | 21 |
| disorder of artery | -0.98 | 1.84E-04 | 51 |
| size of bone | 0.691 | 1.84E-04 | 23 |
| migration of endothelial cells | -1.801 | 1.85E-04 | 27 |
| proliferation of B-lymphocyte derived cell lines | -3.116 | 1.87E-04 | 13 |
| apoptosis of prostate cancer cells | -1 | 1.89E-04 | 5 |
| recruitment of lymphocytes | -2.375 | 1.92E-04 | 11 |
| migration of brain cancer cell lines | -1.929 | 1.94E-04 | 12 |
| apoptosis of tumor cells | 1.622 | 2.02E-04 | 24 |
| abnormal morphology of kidney | 0 | 2.03E-04 | 20 |
| abnormal morphology of spleen | 0 | 2.07E-04 | 22 |
| hypertrophy of tissue | 0.176 | 2.07E-04 | 22 |
| function of blood vessel | 0 | 2.09E-04 | 8 |
| phosphorylation of L-tyrosine | -1.964 | 2.13E-04 | 16 |
| lymphoproliferative malignancy | 0 | 2.16E-04 | 39 |
| activation of stem cells | 1 | 2.17E-04 | 4 |
| formation of blister | 0 | 2.17E-04 | 4 |
| morphology of brain | 0 | 2.18E-04 | 34 |
| cell viability of ovarian cancer cell lines | -1.331 | 2.18E-04 | 7 |
| activation of blood cells | -1.801 | 2.2E-04 | 53 |
| morphology of lymphatic system component | 0 | 2.23E-04 | 31 |
| activation of leukocytes | -1.884 | 2.28E-04 | 50 |
| malignant neoplasm of aerodigestive tract | 0 | 2.3E-04 | 44 |
| development of epithelial tissue | -1.005 | 2.34E-04 | 38 |
| activation of enzyme | -2.449 | 2.35E-04 | 30 |
| function of blood cells | -2.397 | 2.4E-04 | 42 |
| invasion of malignant tumor | -1.466 | 2.45E-04 | 15 |
| leukopenia | 0.928 | 2.5E-04 | 13 |
| cellular homeostasis | -1.908 | 2.51E-04 | 94 |
| accumulation of asialo GM2 ganglioside | 0 | 2.51E-04 | 3 |
| delay in apoptosis of lymphoma cell lines | 0 | 2.51E-04 | 3 |
| drug resistance of lung cancer cell lines | 0 | 2.51E-04 | 3 |
| tumorigenesis of intestinal adenoma | 0 | 2.51E-04 | 3 |
| quantity of cytokine | 1.784 | 2.54E-04 | 21 |
| width of hypertrophic chondrocyte layer | 0.649 | 2.54E-04 | 7 |
| recruitment of cells | -3.344 | 2.58E-04 | 28 |
| function of leukocytes | -2.179 | 2.63E-04 | 39 |
| infiltration of leukocytes | -1.474 | 2.63E-04 | 31 |
| re-epithelialization | 0 | 2.65E-04 | 6 |
| colony formation | -1.642 | 2.67E-04 | 37 |
| cell death of immune cells | -1.11 | 2.68E-04 | 47 |
| proliferation of vascular smooth muscle cells | 0.171 | 2.7E-04 | 16 |
| vascularization | -0.251 | 2.7E-04 | 20 |
| quantity of IgG | -1.453 | 2.71E-04 | 19 |
| development of urinary tract | -1.187 | 2.71E-04 | 23 |
| development of endothelial tissue | -0.628 | 2.74E-04 | 29 |
| size of body | -4.379 | 2.76E-04 | 55 |
| cytolysis | -0.444 | 2.82E-04 | 23 |
| transactivation | -2.486 | 2.84E-04 | 41 |
| fibrosis of kidney | 1.086 | 2.85E-04 | 10 |
| cell death of bone cancer cell lines | 0.413 | 2.86E-04 | 16 |
| quantity of hematopoietic progenitor cells | 0.585 | 2.91E-04 | 32 |
| function of lymphatic system cells | 0 | 2.95E-04 | 7 |
| morphogenesis of neurons | -1.562 | 3E-04 | 31 |
| differentiation of CD4+ T-lymphocytes | -0.447 | 3.04E-04 | 8 |
| development of body axis | -0.14 | 3.13E-04 | 62 |
| cell death of lymphoma cell lines | 0.007 | 3.13E-04 | 19 |
| homing of mononuclear leukocytes | -1.876 | 3.13E-04 | 19 |
| transport of molecule | -3.503 | 3.18E-04 | 96 |
| binding of bone cancer cell lines | 1.4 | 3.18E-04 | 4 |
| development of TREG cells | 0 | 3.18E-04 | 4 |
| emigration of neutrophils | -1.982 | 3.18E-04 | 4 |
| formation of osteoclasts | -0.045 | 3.31E-04 | 13 |
| transformation of fibroblast cell lines | -2.804 | 3.32E-04 | 21 |
| cytostasis | 0 | 3.32E-04 | 23 |
| acute leukemia | -1.99 | 3.33E-04 | 59 |
| quantity of enzyme | 0.062 | 3.34E-04 | 12 |
| carcinoma in lung | 2.335 | 3.39E-04 | 54 |
| proliferation of synovial cells | -1.7 | 3.4E-04 | 7 |
| chemotaxis of myeloid cells | -2.646 | 3.41E-04 | 24 |
| endothelial cell development | -0.589 | 3.41E-04 | 28 |
| proliferation of leukocyte cell lines | -2.881 | 3.44E-04 | 18 |
| immune response of leukocytes | -2.285 | 3.45E-04 | 25 |
| cell movement of myeloid cells | -2.243 | 3.53E-04 | 40 |
| glomerulosclerosis | 0.822 | 3.55E-04 | 13 |
| lymphocytic leukemia | 0 | 3.55E-04 | 37 |
| pancreatic tumor | 0.24 | 3.65E-04 | 73 |
| proliferation of smooth muscle cells | -0.708 | 3.68E-04 | 24 |
| G1 phase | -1.408 | 3.71E-04 | 29 |
| mineralization of connective tissue | 0.956 | 3.74E-04 | 15 |
| proliferation of colon cancer cell lines | 0.582 | 3.78E-04 | 21 |
| quantity of neutrophils | 0.863 | 3.79E-04 | 19 |
| tumor antigen-positive non-small cell lung cancer | 0 | 3.79E-04 | 6 |
| quantity of tumor | 0.389 | 3.79E-04 | 13 |
| abnormal morphology of brain | 0 | 3.85E-04 | 32 |
| development of gastrointestinal tract | -1.969 | 3.95E-04 | 21 |
| frequency of hematopoietic progenitor cells | -1.109 | 3.98E-04 | 5 |
| cell death of blood cells | -0.947 | 3.99E-04 | 48 |
| quantity of IgG1 | -0.731 | 4.06E-04 | 13 |
| formation of neural tube | 0 | 4.09E-04 | 11 |
| cell movement of breast cell lines | -0.693 | 4.09E-04 | 10 |
| morphology of lymphatic system cells | 0 | 4.09E-04 | 10 |
| inflammation of body region | 2.406 | 4.13E-04 | 61 |
| quantity of thymocytes | -0.066 | 4.16E-04 | 19 |
| growth of mammary gland | -2.213 | 4.18E-04 | 9 |
| cell death of lymphocytes | -0.188 | 4.25E-04 | 30 |
| formation of gland | -1.813 | 4.26E-04 | 20 |
| non-small cell lung cancer | 2.529 | 4.27E-04 | 51 |
| abnormal morphology of tooth | 0 | 4.33E-04 | 8 |
| proliferation of pericytes | -1.093 | 4.33E-04 | 8 |
| estrogen receptor negative breast tumor | 0 | 4.33E-04 | 14 |
| G1/S phase transition | -1.629 | 4.39E-04 | 18 |
| arrest in cell cycle progression of cancer cells | 0 | 4.49E-04 | 4 |
| PKB signaling | -0.128 | 4.49E-04 | 6 |
| apoptosis of leukemia cell lines | 1.16 | 4.57E-04 | 23 |
| differentiation of helper T lymphocytes | -0.801 | 4.58E-04 | 17 |
| congenital anomaly of limb | 2.373 | 4.71E-04 | 15 |
| neovascularization | -0.362 | 4.71E-04 | 15 |
| acute myeloid leukemia | 0 | 4.73E-04 | 53 |
| colony formation of cells | -1.809 | 4.75E-04 | 34 |
| differentiation of myeloid cells | -0.88 | 4.75E-04 | 23 |
| cell spreading of tumor cell lines | -2.362 | 4.78E-04 | 11 |
| papillary thyroid cancer | 0 | 4.78E-04 | 11 |
| embryonal tumor | -1.109 | 4.78E-04 | 19 |
| dorsal-ventral axis patterning | 0 | 4.84E-04 | 8 |
| development of lymphatic system | -1.008 | 4.89E-04 | 27 |
| Finnish type amyloidosis | 0 | 4.91E-04 | 3 |
| arrest in G1 phase of skin cell lines | 0 | 4.91E-04 | 3 |
| cell spreading of endothelial cell lines | 0 | 4.91E-04 | 3 |
| clearance of neutrophils | 0 | 4.91E-04 | 3 |
| colony formation of kidney cancer cell lines | 0 | 4.91E-04 | 3 |
| differentiation of embryoid body cells | 0 | 4.91E-04 | 3 |
| formation of cervical cancer cell lines | 0 | 4.91E-04 | 3 |
| movement of cholesterol | 0 | 4.91E-04 | 3 |
| radiosensitivity of lung cancer cell lines | 0 | 4.91E-04 | 3 |
| transport of protein | 0.277 | 4.94E-04 | 23 |
| formation of epidermis | 0 | 4.95E-04 | 16 |
| morphogenesis of neurites | -1.562 | 4.98E-04 | 30 |
| proliferation of hematopoietic cell lines | -2.995 | 5E-04 | 19 |
| interphase | -1.424 | 5.07E-04 | 44 |
| cutaneous T-cell lymphoma | 0 | 5.11E-04 | 7 |
| apoptosis of mononuclear leukocytes | 0.434 | 5.12E-04 | 28 |
| proliferation of T lymphocytes | 0.653 | 5.15E-04 | 42 |
| growth of organism | -1.911 | 5.18E-04 | 55 |
| vascular lesion | -0.048 | 5.23E-04 | 19 |
| formation of filopodia | -0.222 | 5.28E-04 | 15 |
| organization of actin | -1.133 | 5.28E-04 | 6 |
| atherosclerosis | -2.029 | 5.33E-04 | 34 |
| quantity of creatinine in blood | 1.342 | 5.4E-04 | 8 |
| survival of organism | -1.855 | 5.51E-04 | 47 |
| proliferation of ovarian cancer cell lines | -1.709 | 5.52E-04 | 12 |
| cell cycle progression of leukocytes | -1.3 | 5.58E-04 | 9 |
| progression of malignant tumor | -0.156 | 5.58E-04 | 9 |
| autophagy | -0.257 | 5.59E-04 | 27 |
| arrest in interphase | 0 | 5.64E-04 | 30 |
| binding of protein binding site | -0.601 | 5.79E-04 | 24 |
| branching of mammary duct | -1.732 | 5.81E-04 | 7 |
| suppression of T lymphocytes | -0.932 | 5.81E-04 | 7 |
| differentiated thyroid cancer | 0 | 5.91E-04 | 12 |
| apoptosis of lymphocytes | 0.271 | 5.98E-04 | 27 |
| differentiation of chondrocytes | 0 | 6E-04 | 11 |
| quantity of actin stress fibers | 1.134 | 6.01E-04 | 8 |
| tumorigenesis of adenoma | -0.156 | 6.01E-04 | 8 |
| migration of connective tissue cells | -1.176 | 6.1E-04 | 16 |
| G1 phase of leukemia cell lines | 0 | 6.11E-04 | 5 |
| drug resistance of tumor cell lines | -1.154 | 6.11E-04 | 5 |
| formation of connective tissue cells | -0.308 | 6.12E-04 | 18 |
| scattering of cells | -1.058 | 6.13E-04 | 9 |
| activation of bone marrow cells | -0.152 | 6.14E-04 | 4 |
| arrest in growth of epithelial cell lines | 0 | 6.14E-04 | 4 |
| binding of Smad binding sequence | 0 | 6.14E-04 | 4 |
| formation of cardiomyocytes | 0 | 6.14E-04 | 4 |
|  | CpG Island Subset | | |
| Disease of Biofunction | **Activation z-score** | **p-value** | **Number of Molecules** |
| cell death | 0.675 | 2.07E-16 | 109 |
| abdominal neoplasm | 0.985 | 1.06E-15 | 191 |
| tumorigenesis of tissue | 0.046 | 7.59E-15 | 192 |
| quantity of cells | -1.345 | 2.63E-14 | 69 |
| neoplasia of epithelial tissue | 0.408 | 2.76E-14 | 189 |
| apoptosis | 1.862 | 3.39E-14 | 90 |
| abdominal cancer | 0.201 | 7.9E-14 | 186 |
| digestive organ tumor | 0.729 | 1.58E-13 | 170 |
| necrosis | 0.482 | 2.42E-13 | 87 |
| cell movement | -2.622 | 3.83E-13 | 76 |
| quantity of synapse | -1 | 5.13E-13 | 13 |
| Gastrointestinal Tract Cancer and Tumors | 0.395 | 8.7E-13 | 131 |
| migration of cells | -2.901 | 1.01E-12 | 70 |
| epithelial cancer | 0.548 | 2.05E-12 | 184 |
| digestive system cancer | -0.2 | 2.82E-12 | 166 |
| cancer | 0.071 | 4.46E-12 | 210 |
| morbidity or mortality | 5.83 | 5.69E-12 | 79 |
| malignant solid tumor | 0.75 | 6.35E-12 | 208 |
| cell viability | -5.174 | 6.36E-12 | 54 |
| cell survival | -5.425 | 1.24E-11 | 56 |
| breast or colorectal cancer | -1.067 | 3.96E-11 | 124 |
| gastrointestinal tract cancer |  | 5.26E-11 | 125 |
| gastrointestinal adenocarcinoma |  | 2.22E-10 | 109 |
| gastrointestinal carcinoma |  | 3.84E-10 | 113 |
| breast cancer |  | 6.51E-10 | 54 |
| organismal death | 6.222 | 1.12E-09 | 73 |
| differentiation of cells | 0.117 | 1.29E-09 | 70 |
| mammary tumor | -2.183 | 1.3E-09 | 56 |
| quantity of lymphocytes | -0.005 | 1.41E-09 | 33 |
| adenocarcinoma | 0.968 | 1.76E-09 | 144 |
| neuronal cell death | -0.552 | 4.42E-09 | 33 |
| differentiation of blood cells | -0.642 | 5.62E-09 | 36 |
| colorectal neoplasia |  | 6.11E-09 | 107 |
| morphology of cells |  | 6.46E-09 | 61 |
| breast or ovarian cancer |  | 7.34E-09 | 60 |
| differentiation of leukocytes | -0.733 | 9.79E-09 | 31 |
| head and neck cancer | 0.975 | 1.26E-08 | 41 |
| apoptosis of neurons | 2.91 | 1.33E-08 | 24 |
| quantity of leukocytes | -0.41 | 1.45E-08 | 37 |
| cecum adenocarcinoma |  | 1.76E-08 | 44 |
| apoptosis of tumor cell lines | 0.502 | 1.89E-08 | 45 |
| melanoma |  | 1.99E-08 | 143 |
| quantity of T lymphocytes | 1.367 | 2.19E-08 | 26 |
| colon tumor |  | 2.3E-08 | 94 |
| quantity of lymphatic system component | 0.134 | 2.31E-08 | 21 |
| head and neck neoplasia | 1.414 | 2.5E-08 | 65 |
| lymphoid cancer | 1.642 | 2.86E-08 | 54 |
| cell death of tumor cell lines | 0.917 | 3.25E-08 | 52 |
| skin lesion | 0.02 | 4.47E-08 | 105 |
| incidence of lung tumor | 2.373 | 4.72E-08 | 9 |
| skin tumor | -0.169 | 5.25E-08 | 104 |
| colorectal cancer |  | 5.83E-08 | 103 |
| quantity of neurons | 0.155 | 7.36E-08 | 22 |
| upper gastrointestinal tract tumor | -1.067 | 8.04E-08 | 55 |
| morphology of spleen |  | 8.82E-08 | 17 |
| neoplasia of colon |  | 9.21E-08 | 92 |
| differentiation of connective tissue | 1.085 | 1.01E-07 | 31 |
| quantity of blood cells | -0.519 | 1.05E-07 | 38 |
| abdominal adenocarcinoma |  | 1.08E-07 | 129 |
| proliferation of cells | -0.971 | 1.1E-07 | 94 |
| colorectal carcinoma |  | 1.23E-07 | 91 |
| thyroid cancer |  | 1.25E-07 | 15 |
| colon adenocarcinoma |  | 1.28E-07 | 86 |
| abdominal carcinoma |  | 1.47E-07 | 130 |
| colon carcinoma |  | 1.55E-07 | 87 |
| colon cancer |  | 1.66E-07 | 91 |
| differentiation of mononuclear leukocytes | -0.038 | 1.72E-07 | 25 |
| pelvic cancer |  | 1.78E-07 | 102 |
| abnormal morphology of spleen |  | 2.39E-07 | 16 |
| development of body trunk | -0.709 | 2.57E-07 | 39 |
| colorectal adenocarcinoma |  | 2.75E-07 | 88 |
| proliferation of blood cells | 0.895 | 3.57E-07 | 33 |
| lymphohematopoietic cancer | 1.636 | 3.62E-07 | 55 |
| benign neoplasia | 0.415 | 3.93E-07 | 34 |
| vasculogenesis | -1.111 | 4.43E-07 | 30 |
| head and neck carcinoma |  | 4.51E-07 | 22 |
| differentiation of lymphocytes | -0.34 | 4.71E-07 | 23 |
| apoptosis of fibroblast cell lines | -1.025 | 4.73E-07 | 18 |
| leukopenia | 0.447 | 4.94E-07 | 11 |
| skin cancer |  | 5.03E-07 | 100 |
| angiogenesis | -1.192 | 5.83E-07 | 34 |
| Lymphocyte homeostasis | -0.508 | 7.08E-07 | 24 |
| adenoma | -0.166 | 7.25E-07 | 24 |
| proliferation of immune cells | 0.421 | 7.77E-07 | 31 |
| urogenital cancer | 0.346 | 7.78E-07 | 102 |
| upper gastrointestinal tract cancer |  | 8.62E-07 | 51 |
| central nervous system tumor | 0.342 | 8.86E-07 | 33 |
| morphology of body cavity |  | 1.03E-06 | 39 |
| cell viability of neurons | -2.774 | 1.1E-06 | 15 |
| proliferation of lymphocytes | 0.741 | 1.1E-06 | 29 |
| differentiation of tumor cell lines | 0.652 | 1.23E-06 | 19 |
| hematologic cancer | 1.193 | 1.33E-06 | 53 |
| response of lymphocytes | -0.838 | 1.43E-06 | 13 |
| leukocyte migration | -0.987 | 1.51E-06 | 33 |
| quantity of tumor cell lines | -0.75 | 1.53E-06 | 11 |
| hematological neoplasia | 0.645 | 1.74E-06 | 54 |
| apoptosis of leukemia cell lines | 0.974 | 1.85E-06 | 16 |
| immune response of T lymphocytes | -0.822 | 1.95E-06 | 10 |
| development of blood cells | -0.876 | 2.05E-06 | 26 |
| cell movement of leukocytes | -0.421 | 2.16E-06 | 30 |
| response of mononuclear leukocytes | -1.062 | 2.22E-06 | 14 |
| abnormal morphology of lymphoid organ |  | 2.3E-06 | 18 |
| production of antibody | -0.626 | 2.44E-06 | 16 |
| morphology of lymphatic system component |  | 2.6E-06 | 19 |
| proliferation of T lymphocytes | 0.972 | 2.77E-06 | 25 |
| epithelial thyroid cancer |  | 2.78E-06 | 12 |
| urothelial cancer |  | 2.87E-06 | 10 |
| development of leukocytes | -0.672 | 3.14E-06 | 24 |
| growth of epithelial tissue | -1.489 | 3.28E-06 | 27 |
| gastroesophageal cancer |  | 3.35E-06 | 46 |
| development of lymphocytes | -0.546 | 3.36E-06 | 23 |
| proliferation of tumor cell lines | -0.791 | 3.39E-06 | 47 |
| migration of tumor cell lines | -2.806 | 3.48E-06 | 27 |
| incidence of tumor | 2.396 | 3.77E-06 | 16 |
| quantity of IgG | -1.092 | 4.29E-06 | 13 |
| invasion of cells | -2.202 | 4.46E-06 | 31 |
| abnormal morphology of enlarged spleen |  | 4.6E-06 | 11 |
| morphology of cardiovascular system |  | 5E-06 | 24 |
| T cell response | -0.705 | 5.09E-06 | 11 |
| neoplasia of stomach |  | 5.35E-06 | 40 |
| function of lymphatic system cells |  | 5.36E-06 | 6 |
| abnormal morphology of body cavity |  | 5.46E-06 | 36 |
| quantity of immunoglobulin | -0.368 | 5.54E-06 | 15 |
| thyroid gland tumor |  | 5.72E-06 | 41 |
| cell death of colon cancer cell lines | -1.325 | 6.55E-06 | 15 |
| hepatocellular carcinoma |  | 7.02E-06 | 94 |
| cell movement of tumor cell lines | -2.546 | 7.31E-06 | 30 |
| transcription of RNA | 0.238 | 7.41E-06 | 51 |
| size of cells |  | 8.73E-06 | 19 |
| cell death of fibroblast cell lines | -0.836 | 9.17E-06 | 19 |
| carcinoma in breast |  | 9.19E-06 | 31 |
| gastric cancer |  | 9.24E-06 | 39 |
| abnormal morphology of cells |  | 9.58E-06 | 38 |
| cell cycle progression of cancer cells |  | 9.6E-06 | 5 |
| cell movement of endothelial cells | -1.668 | 9.89E-06 | 17 |
| proliferation of myeloid cells | 0.966 | 1.05E-05 | 9 |
| development of lymphatic system component | -0.264 | 1.06E-05 | 15 |
| delay in apoptosis of lymphoma cell lines |  | 1.11E-05 | 3 |
| incidence of adenocarcinoma | 2.646 | 1.12E-05 | 7 |
| T cell homeostasis | -0.058 | 1.13E-05 | 21 |
| hepatobiliary system cancer | 0.849 | 1.13E-05 | 96 |
| cell viability of tumor cell lines | -3.446 | 1.15E-05 | 28 |
| invasion of tumor cell lines | -2.313 | 1.19E-05 | 25 |
| transcription | -0.301 | 1.26E-05 | 53 |
| development of digestive system | -1.154 | 1.3E-05 | 17 |
| central nervous system cancer |  | 1.36E-05 | 28 |
| tumorigenesis of benign tumor | -0.206 | 1.36E-05 | 8 |
| proliferation of hematopoietic progenitor cells | 1.519 | 1.37E-05 | 13 |
| migration of endothelial cells | -1.234 | 1.44E-05 | 16 |
| fibrogenesis | -1.566 | 1.51E-05 | 18 |
| endocrine gland tumor | 1.916 | 1.7E-05 | 44 |
| genital tumor | 1.854 | 1.74E-05 | 90 |
| gastroesophageal adenocarcinoma |  | 1.85E-05 | 39 |
| differentiation of B lymphocytes | -1.37 | 1.85E-05 | 12 |
| formation of lymphatic system component | 0.208 | 2.04E-05 | 14 |
| gastric adenocarcinoma |  | 2.05E-05 | 34 |
| cell viability of B lymphocytes | -1.109 | 2.05E-05 | 8 |
| development of lymphatic system | -0.581 | 2.06E-05 | 16 |
| malignant cutaneous melanoma cancer |  | 2.09E-05 | 92 |
| differentiation of embryoid body cells |  | 2.2E-05 | 3 |
| liver tumor | 0.218 | 2.26E-05 | 95 |
| apoptosis of lymphoma cell lines | -1.145 | 2.31E-05 | 11 |
| cell death of lymphoma cell lines | -0.843 | 2.32E-05 | 12 |
| quantity of IgG1 | -1.066 | 2.36E-05 | 9 |
| function of leukocytes | -1.928 | 2.4E-05 | 21 |
| T cell development | -0.058 | 2.46E-05 | 20 |
| respiratory system tumor | 1.845 | 2.53E-05 | 35 |
| quantity of hematopoietic progenitor cells | 0.954 | 2.57E-05 | 18 |
| formation of lymphoid organ | 0.094 | 2.74E-05 | 13 |
| lymphocytic cancer | 2.764 | 2.9E-05 | 24 |
| breast or ovarian carcinoma |  | 3.12E-05 | 37 |
| abnormal morphology of cardiovascular system |  | 3.12E-05 | 21 |
| development of endothelial cell lines |  | 3.16E-05 | 4 |
| genital tract cancer |  | 3.41E-05 | 86 |
| intraepithelial neoplasia |  | 3.6E-05 | 9 |
| reorganization of cytoskeleton | -0.161 | 3.61E-05 | 11 |
| gastro-esophageal carcinoma |  | 3.74E-05 | 40 |
| cell movement of lymphocytes | 0.512 | 3.76E-05 | 17 |
| radiosensitivity of lung cancer cell lines |  | 3.81E-05 | 3 |
| Wound |  | 3.85E-05 | 12 |
| quantity of lymphoid organ | 0.062 | 3.86E-05 | 14 |
| apoptosis of blood cells | 0.289 | 3.89E-05 | 20 |
| re-entry into S phase | -1 | 3.95E-05 | 5 |
| delay in apoptosis of tumor cell lines |  | 3.97E-05 | 4 |
| apoptosis of leukocytes | 0.029 | 4.06E-05 | 19 |
| formation of mammary gland | -1.624 | 4.21E-05 | 11 |
| cell death of blood cells | -0.743 | 4.3E-05 | 25 |
| activation of T lymphocytes | -1.341 | 4.39E-05 | 16 |
| proliferation of chondrocytes | -0.088 | 4.42E-05 | 7 |
| cell death of B lymphocytes | 1.753 | 4.62E-05 | 9 |
| dysgenesis | 2.305 | 4.65E-05 | 20 |
| activation of DNA endogenous promoter | 1.029 | 4.76E-05 | 35 |
| quantity of B lymphocytes | -1.116 | 4.77E-05 | 15 |
| formation of actin filaments | -1.265 | 4.86E-05 | 14 |
| quantity of lymphatic system cells | 0.512 | 4.87E-05 | 13 |
| tumorigenesis of genital organ | 1.6 | 4.89E-05 | 86 |
| transitional cell bladder cancer |  | 5.16E-05 | 8 |
| growth of tumor | -1.692 | 5.16E-05 | 27 |
| abnormal morphology of thoracic cavity |  | 5.25E-05 | 21 |
| cell death of immune cells | -0.951 | 5.28E-05 | 24 |
| formation of gland | -0.862 | 5.41E-05 | 12 |
| expression of RNA | -0.093 | 5.49E-05 | 54 |
| lung tumor | 1.845 | 5.63E-05 | 33 |
| quantity of enzyme | -1.132 | 5.77E-05 | 8 |
| formation of actin stress fibers | -1.046 | 5.79E-05 | 12 |
| gliomatosis | 0.728 | 5.96E-05 | 26 |
| cell death of breast cancer cell lines | 1.454 | 6.03E-05 | 15 |
| tumorigenesis of epithelial neoplasm | -0.854 | 6.22E-05 | 10 |
| cell transformation | -1.266 | 6.28E-05 | 18 |
| cell movement of carcinoma cell lines | -0.764 | 6.35E-05 | 11 |
| differentiation of plasma cells | -0.44 | 6.56E-05 | 5 |
| differentiation of epithelial cells | 0.299 | 6.79E-05 | 14 |
| healing of wound |  | 7.02E-05 | 10 |
| quantity of memory T lymphocytes | 1.213 | 7.12E-05 | 6 |
| differentiation of connective tissue cells | 1.403 | 7.15E-05 | 23 |
| lymphopenia |  | 7.15E-05 | 7 |
| apoptosis of colon cancer cell lines | -1.102 | 7.27E-05 | 12 |
| advanced stage solid tumor |  | 7.66E-05 | 19 |
| squamous-cell carcinoma |  | 8.03E-05 | 27 |
| cell death of connective tissue cells | -0.173 | 8.3E-05 | 22 |
| lymphopoiesis |  | 8.41E-05 | 6 |
| organization of cytoskeleton | -1.086 | 8.49E-05 | 39 |
| formation of lymphocytes | 0.155 | 8.88E-05 | 8 |
| growth of connective tissue | -1.507 | 9.01E-05 | 23 |
| interphase of skin cell lines |  | 9.01E-05 | 3 |
| radiosensitivity of carcinoma cell lines |  | 9.01E-05 | 3 |
| cytostasis | 0.463 | 9.07E-05 | 13 |
| necrosis of epithelial tissue | -1.49 | 9.19E-05 | 22 |
| differentiation of lymphoma cell lines | -0.005 | 9.26E-05 | 5 |
| foliation of cerebellum |  | 9.26E-05 | 5 |
| immune response of leukocytes | -1.138 | 9.61E-05 | 14 |
| incidence of sarcoma | 1.709 | 9.87E-05 | 6 |
| secretion of molecule | -0.978 | 9.9E-05 | 21 |
| incidence of malignant tumor | 2.512 | 1.04E-04 | 10 |
| apoptosis of lymphocytes | -0.353 | 1.04E-04 | 15 |
| lung cancer | 1.796 | 1.05E-04 | 31 |
| cell movement of mononuclear leukocytes | 0.44 | 1.05E-04 | 18 |
| abnormal morphology of abdomen |  | 1.07E-04 | 27 |
| formation of embryonic tissue |  | 1.07E-04 | 13 |
| angiogenesis of benign tumor |  | 1.09E-04 | 2 |
| cell spreading of eye cell lines |  | 1.09E-04 | 2 |
| entry into S phase of intestinal cell lines |  | 1.09E-04 | 2 |
| epidermodysplasia verruciformis |  | 1.09E-04 | 2 |
| ingestion of Streptococcus sp group A |  | 1.09E-04 | 2 |
| invasion of Streptococcus sp group A |  | 1.09E-04 | 2 |
| myelination of white matter |  | 1.09E-04 | 2 |
| survival of thyrocytes |  | 1.09E-04 | 2 |
| invasion of breast cancer cell lines | -0.671 | 1.09E-04 | 12 |
| necrosis of vascular endothelial cells | -1.756 | 1.09E-04 | 8 |
| bladder carcinoma |  | 1.12E-04 | 18 |
| arrest in proliferation of tumor cell lines |  | 1.15E-04 | 8 |
| formation of hematopoietic cells | -0.218 | 1.15E-04 | 8 |
| development of gastrointestinal tract |  | 1.19E-04 | 12 |
| formation of skin | 0.958 | 1.23E-04 | 15 |
| oral tumor |  | 1.23E-04 | 13 |
| intestinal adenoma |  | 1.25E-04 | 10 |
| movement of vascular endothelial cells | -1.657 | 1.25E-04 | 10 |
| cell death of lymphocytes | -0.515 | 1.26E-04 | 16 |
| apoptosis of B lymphocytes | 1.671 | 1.26E-04 | 8 |
| incidence of carcinoma | 2.208 | 1.26E-04 | 8 |
| quantity of lymph follicle | -0.378 | 1.26E-04 | 8 |
| clustering of dendritic cells |  | 1.28E-04 | 3 |
| endomitosis |  | 1.28E-04 | 3 |
| transport of protein | -0.152 | 1.34E-04 | 13 |
| cytopenia | 0.714 | 1.37E-04 | 13 |
| apoptosis of breast cancer cell lines | 0.881 | 1.41E-04 | 13 |
| apoptosis of tumor cells | 0.121 | 1.41E-04 | 13 |
| immune response of cells | -0.948 | 1.42E-04 | 21 |
| proliferation of B lymphocytes | 0.488 | 1.45E-04 | 13 |
| protein kinase cascade | -1.644 | 1.47E-04 | 16 |
| cell-mediated response | -1.153 | 1.5E-04 | 10 |
| serous ovarian carcinoma |  | 1.5E-04 | 10 |
| morphology of blood cells |  | 1.53E-04 | 16 |
| development of epithelial tissue | -0.422 | 1.54E-04 | 19 |
| transcription of DNA | 0.889 | 1.57E-04 | 40 |
| cytostasis of tumor cell lines | 0.122 | 1.6E-04 | 9 |
| cell movement of brain cancer cell lines | -0.705 | 1.61E-04 | 8 |
| Hypoplasia | 2.137 | 1.62E-04 | 18 |
| female genital tract serous cancer |  | 1.62E-04 | 15 |
| systemic lupus erythematosus |  | 1.66E-04 | 10 |
| growth of mammary gland | -1.715 | 1.67E-04 | 6 |
| colony formation | -0.014 | 1.69E-04 | 19 |
| development of connective tissue | -0.913 | 1.7E-04 | 15 |
| cell viability of ovarian cancer cell lines | -1.491 | 1.72E-04 | 5 |
| abnormal morphology of enlarged testis |  | 1.74E-04 | 3 |
| activation of stem cells |  | 1.74E-04 | 3 |
| growth of organism | -1.198 | 1.79E-04 | 27 |
| generation of blood cells | -1.77 | 1.81E-04 | 9 |
| cellular homeostasis | -0.366 | 1.81E-04 | 42 |
| formation of cytoskeleton | -1.489 | 1.81E-04 | 15 |
| formation of hair follicle |  | 1.87E-04 | 7 |
| transport of molecule | -2.385 | 1.88E-04 | 44 |
| homing of cells | -1.587 | 1.91E-04 | 20 |
| proliferation of granulosa cells | 0.152 | 1.95E-04 | 4 |
| formation of blood cells | -0.378 | 1.98E-04 | 10 |
| development of endothelial tissue | 0.14 | 2.03E-04 | 15 |
| function of lymphocytes | -1.928 | 2.07E-04 | 14 |
| abnormality of lymphatic system |  | 2.07E-04 | 5 |
| delay in apoptosis |  | 2.07E-04 | 5 |
| interstitial fibrosis of kidney | 0.391 | 2.07E-04 | 5 |
| incidence of lymphoma | 2.608 | 2.08E-04 | 7 |
| proliferation of ovarian cancer cell lines | -0.724 | 2.11E-04 | 8 |
| activation of mononuclear leukocytes | -1.41 | 2.22E-04 | 18 |
| leukemia |  | 2.23E-04 | 35 |
| arrest in G1 phase of breast cancer cell lines |  | 2.24E-04 | 4 |
| differentiation of plasmablasts |  | 2.31E-04 | 3 |
| G0/G1 phase transition |  | 2.35E-04 | 6 |
| acute coronary syndrome | -0.577 | 2.43E-04 | 11 |
| development of body axis | -1 | 2.45E-04 | 30 |
| cardiogenesis | -1.091 | 2.46E-04 | 17 |
| development of cytoplasm | -1.683 | 2.46E-04 | 17 |
| arrest in interphase |  | 2.52E-04 | 16 |
| migration of carcinoma cell lines | -0.67 | 2.55E-04 | 9 |
| morphology of head |  | 2.57E-04 | 26 |
| abnormal morphology of head |  | 2.64E-04 | 25 |
| morphology of tooth |  | 2.67E-04 | 6 |
| apoptosis of vascular endothelial cells | -1.756 | 2.71E-04 | 7 |
| neoplasia of tumor cell lines | -0.097 | 2.74E-04 | 13 |
| growth of lymphoid organ | 0.92 | 2.75E-04 | 9 |
| cell death of leukocyte cell lines | -1.18 | 2.76E-04 | 10 |
| development of carcinoma |  | 2.85E-04 | 6 |
| mineralization of cells | 0.636 | 2.85E-04 | 6 |
| myocardial infarction | -0.577 | 2.85E-04 | 10 |
| Lymphocyte migration | 0.325 | 2.92E-04 | 14 |
| cell death of bone cancer cell lines | -0.579 | 2.95E-04 | 9 |
| migration of vascular endothelial cells | -1.431 | 2.95E-04 | 9 |
| activation of cells | -1.891 | 2.98E-04 | 30 |
| morphology of heart |  | 2.98E-04 | 15 |
| senescence of cells | -1.34 | 2.98E-04 | 11 |
| formation of T lymphocytes |  | 3.15E-04 | 7 |
| cytolysis | -0.822 | 3.16E-04 | 12 |
| proliferation of splenocytes | 0.52 | 3.22E-04 | 6 |
| inflammatory response | -1.541 | 3.23E-04 | 25 |
| apoptosis of thyrocytes |  | 3.23E-04 | 2 |
| arrest in differentiation of tumor cell lines |  | 3.23E-04 | 2 |
| avellino corneal dystrophy |  | 3.23E-04 | 2 |
| cell cycle progression of prostate cancer cells |  | 3.23E-04 | 2 |
| clustering of follicular dendritic cells |  | 3.23E-04 | 2 |
| degeneration of nephron |  | 3.23E-04 | 2 |
| lactation of mammary gland |  | 3.23E-04 | 2 |
| development of hematopoietic system | -0.164 | 3.25E-04 | 11 |
| growth of embryo | -2.042 | 3.25E-04 | 17 |
| differentiation of granulocytes | -0.606 | 3.3E-04 | 7 |
| activation of lymphocytes | -1.109 | 3.37E-04 | 17 |
| differentiation of red blood cells | 0 | 3.38E-04 | 8 |
| synthesis of protein | -2.157 | 3.43E-04 | 17 |
| neoplasia of cells | -0.526 | 3.73E-04 | 16 |
| abnormal morphology of incisor |  | 3.74E-04 | 4 |
| systemic autoimmune syndrome | -0.063 | 3.75E-04 | 30 |
| arrest in cell cycle progression of cancer cells |  | 3.76E-04 | 3 |
| severe thrombocytopenia |  | 3.76E-04 | 3 |
| shape change of endothelial cell lines |  | 3.76E-04 | 3 |
| tumorigenesis of intestinal tumor |  | 3.76E-04 | 3 |
| quantity of plasma cells | 1.452 | 3.76E-04 | 5 |
| formation of filaments | -1.471 | 3.82E-04 | 15 |
| cell death of kidney cells | 0.784 | 3.97E-04 | 14 |
| prostatic intraepithelial neoplasia |  | 4.01E-04 | 7 |
| formation of epidermis |  | 4.06E-04 | 9 |
| differentiation of phagocytes | -0.049 | 4.06E-04 | 11 |
| papillary adenocarcinoma |  | 4.06E-04 | 11 |
| adipogenesis | 1.39 | 4.14E-04 | 8 |
| transformation of fibroblast cell lines | -1.497 | 4.17E-04 | 11 |
| cell movement of breast cancer cell lines | -1.465 | 4.18E-04 | 12 |
| proliferation of endothelial cells | 0.072 | 4.2E-04 | 13 |
| tumorigenesis of gonad | 1.452 | 4.27E-04 | 24 |
| apoptosis of T lymphocytes | -1.597 | 4.29E-04 | 12 |
| cell death of T lymphocytes | -1.625 | 4.29E-04 | 13 |
| development of vasculature |  | 4.3E-04 | 15 |
| advanced malignant tumor | -0.965 | 4.35E-04 | 25 |
| abnormal morphology of tooth |  | 4.39E-04 | 5 |
| proliferation of pericytes | -2 | 4.39E-04 | 5 |
| quantity of GPT in blood | -1.406 | 4.39E-04 | 5 |
| colony formation of cells | -0.243 | 4.49E-04 | 17 |
| quantity of lesion | 0.216 | 4.49E-04 | 9 |
| secretion of lipid | -1.258 | 4.54E-04 | 10 |
| endothelial cell development | 0.14 | 4.61E-04 | 14 |
| cell viability of lymphocytes | -1.33 | 4.65E-04 | 9 |
| arrest in growth of epithelial cell lines |  | 4.66E-04 | 3 |
| arrest in interphase of endothelial cells |  | 4.66E-04 | 3 |
| systemic inflammatory response syndrome |  | 4.7E-04 | 4 |
| dorsal-ventral axis patterning |  | 4.74E-04 | 5 |
| non-small cell lung cancer | 3 | 4.75E-04 | 25 |
| carcinoma in lung | 2.53 | 4.78E-04 | 26 |
| NK cell development |  | 4.87E-04 | 6 |
| proliferation of connective tissue cells | -1.05 | 4.92E-04 | 20 |
| cancer of secretory structure | 0.346 | 4.97E-04 | 47 |
| diabetes mellitus | 0.896 | 5E-04 | 30 |
| proliferation of vascular endothelial cells | 0.014 | 5.02E-04 | 8 |
| development of abdomen | -0.335 | 5.05E-04 | 19 |
| advanced stage ovarian tumor |  | 5.05E-04 | 7 |
| papilloma | 0.747 | 5.05E-04 | 7 |
| formation of cells | -0.972 | 5.05E-04 | 28 |
| hypertrophy of cells | 0 | 5.09E-04 | 12 |
| primary neoplasm |  | 5.09E-04 | 12 |
| abnormal morphology of enlarged lymph node |  | 5.15E-04 | 6 |
| morphology of connective tissue |  | 5.21E-04 | 16 |
| radiosensitivity of tumor cell lines | 1.969 | 5.25E-04 | 4 |
| psoriasis |  | 5.37E-04 | 19 |
| development of malignant tumor | 0.106 | 5.41E-04 | 8 |
| quantity of thymocytes | 0.122 | 5.42E-04 | 10 |
| generation of cells | -1.684 | 5.45E-04 | 11 |
| Rheumatic Disease | -0.841 | 5.45E-04 | 30 |
| gonadal tumor | 1.491 | 5.47E-04 | 24 |
| abnormal bone density | 1.067 | 5.48E-04 | 9 |
| cell-mediated response of T lymphocytes | -0.394 | 5.49E-04 | 5 |
| synthesis of DNA | -1.525 | 5.6E-04 | 16 |
| dystrophy of cornea |  | 5.69E-04 | 3 |
| invasion of bacteria |  | 5.69E-04 | 3 |
| proliferation of myeloid progenitor cells | 1.982 | 5.84E-04 | 4 |
| tumorigenesis of papilloma | -0.762 | 5.84E-04 | 4 |
| morphology of leukocytes |  | 5.86E-04 | 13 |
| incidence of head and neck tumor | 1.41 | 5.9E-04 | 5 |
| tumorigenesis of adenoma |  | 5.9E-04 | 5 |
| growth of skin | -0.648 | 5.9E-04 | 10 |
| lymphatic node tumor | 2.412 | 5.91E-04 | 18 |
| interphase | -1.454 | 6.21E-04 | 21 |
| formation of thymus gland |  | 6.28E-04 | 8 |
| proliferation of keratinocytes | -0.704 | 6.28E-04 | 8 |
| cell death of endocrine cells | -0.332 | 6.29E-04 | 7 |
| formation of hematopoietic progenitor cells | -0.218 | 6.29E-04 | 7 |
| microtubule dynamics | -1.105 | 6.32E-04 | 32 |
| female genital neoplasm | 1.698 | 6.32E-04 | 75 |
| growth of kidney | 0.592 | 6.39E-04 | 6 |
| arrest in cell cycle progression of cardiomyocytes |  | 6.43E-04 | 2 |
| branching of tubular cells |  | 6.43E-04 | 2 |
| cell cycle progression of smooth muscle cell lines |  | 6.43E-04 | 2 |
| contraction phase of T lymphocytes |  | 6.43E-04 | 2 |
| entry into S phase of skin cell lines |  | 6.43E-04 | 2 |
| expansion of macrophages |  | 6.43E-04 | 2 |
| formation of Ab-secreting B cells |  | 6.43E-04 | 2 |
| morphology of nuclear bodies |  | 6.43E-04 | 2 |
| unbundling |  | 6.43E-04 | 2 |
| congenital anomaly of musculoskeletal system | 2.442 | 6.45E-04 | 22 |
| chemotaxis of cells | -1.617 | 6.61E-04 | 18 |
| differentiation of T lymphocytes | 0.462 | 6.65E-04 | 14 |
| arrest in interphase of tumor cell lines |  | 6.69E-04 | 11 |
| scattering | 0.106 | 6.74E-04 | 6 |
| expansion of cells | 1.892 | 6.75E-04 | 12 |
| progression of tumor | -1.387 | 6.75E-04 | 8 |
| apoptosis of cancer cells | -0.102 | 6.8E-04 | 10 |
| cell death of sarcoma cell lines | -0.989 | 6.8E-04 | 10 |
| arrest in interphase of pancreatic cancer cell lines |  | 6.86E-04 | 3 |
| formation of mammary lobuloalveolar unit |  | 6.86E-04 | 3 |
| migration of skin cancer cell lines |  | 6.86E-04 | 3 |
| lymphoproliferative disorder | 0.853 | 6.87E-04 | 24 |
| accumulation of lipid | -0.052 | 6.96E-04 | 13 |
| expansion of blood cells | 1.654 | 6.99E-04 | 10 |
| survival of organism | -2.018 | 7.18E-04 | 22 |
| arrest in G0/G1 phase transition |  | 7.26E-04 | 5 |
| cell viability of melanoma cell lines | -0.555 | 7.26E-04 | 5 |
| anemia | 2.945 | 7.42E-04 | 13 |
| abnormal morphology of hair |  | 7.47E-04 | 6 |
| growth of blood vessel | -1.342 | 7.47E-04 | 6 |
| proliferation of fibroblast cell lines | -0.81 | 7.48E-04 | 15 |
| generation of leukocytes | -1.77 | 7.51E-04 | 8 |
| proliferation of epithelial cells | -2.192 | 7.72E-04 | 17 |
| branching of exocrine gland | -1.964 | 7.76E-04 | 5 |
| quantity of striated muscle | 1.109 | 7.76E-04 | 5 |
| tumorigenesis of adenocarcinoma | -1.067 | 7.76E-04 | 5 |
| closure of neural tube |  | 7.77E-04 | 7 |
| chorioallantoic membrane fusion failure | 1.067 | 7.88E-04 | 4 |
| proliferation of brain cancer cell lines | -1.001 | 7.99E-04 | 9 |
| G1 phase of epithelial cells |  | 8.17E-04 | 3 |
| abnormal morphology of disorganized retinal layer |  | 8.17E-04 | 3 |
| accumulation of extracellular matrix |  | 8.17E-04 | 3 |
| apoptosis of mammary cells |  | 8.17E-04 | 3 |
| proliferation of synovial fibroblasts |  | 8.17E-04 | 3 |
| quantity of carcinoma cell lines |  | 8.17E-04 | 3 |
| organization of intercellular junctions |  | 8.29E-04 | 5 |
| phosphorylation of protein | -0.968 | 8.29E-04 | 22 |
| development of head | -0.6 | 8.36E-04 | 27 |
| size of bone | 0.958 | 8.36E-04 | 11 |
| glomerulosclerosis | 0 | 8.43E-04 | 7 |
| morphology of mouth |  | 8.43E-04 | 7 |
| quantity of tumor | -0.239 | 8.43E-04 | 7 |
| apoptosis of connective tissue cells | 0.698 | 8.46E-04 | 12 |
| proliferation of colon cancer cell lines | 1.221 | 8.57E-04 | 11 |
| homing of leukocytes | -1.143 | 8.57E-04 | 14 |
| secretion of aldosterone | -1.964 | 8.66E-04 | 4 |
| internalization of protein |  | 8.69E-04 | 6 |
| migration of fibroblast cell lines | -1.65 | 8.78E-04 | 7 |
| selection of cells |  | 8.84E-04 | 5 |
| cell death of kidney cell lines | 0.443 | 9.04E-04 | 12 |
| apoptosis of endocrine cells | 0.061 | 9.13E-04 | 6 |
| activation of leukocytes | -1.022 | 9.31E-04 | 22 |
| Ovarian Cancer and Tumors | 1.432 | 9.43E-04 | 22 |
| proliferation of granulocytes | 1 | 9.5E-04 | 4 |
| synthesis of L-amino acid |  | 9.5E-04 | 4 |
| differentiation of antigen presenting cells | -0.945 | 9.56E-04 | 9 |
| adipogenesis of fat |  | 9.62E-04 | 3 |
| cell cycle progression of kidney cell lines |  | 9.62E-04 | 3 |
| proliferation of fibroblast-like synoviocytes |  | 9.62E-04 | 3 |
| apoptosis of kidney cell lines | 0.519 | 9.91E-04 | 10 |
| formation of neural tube |  | 1.01E-03 |  |
